# Supplementary material for: Antigen-Specific IFN-γ Responses Correlate with the Activity of M. tuberculosis Infection but Are Not Associated with the Severity of Tuberculosis Disease
Source: Hindawi journal article supplement (doi:10.1155/2016/7249369), 2016-01-01

Supplement Figure 2

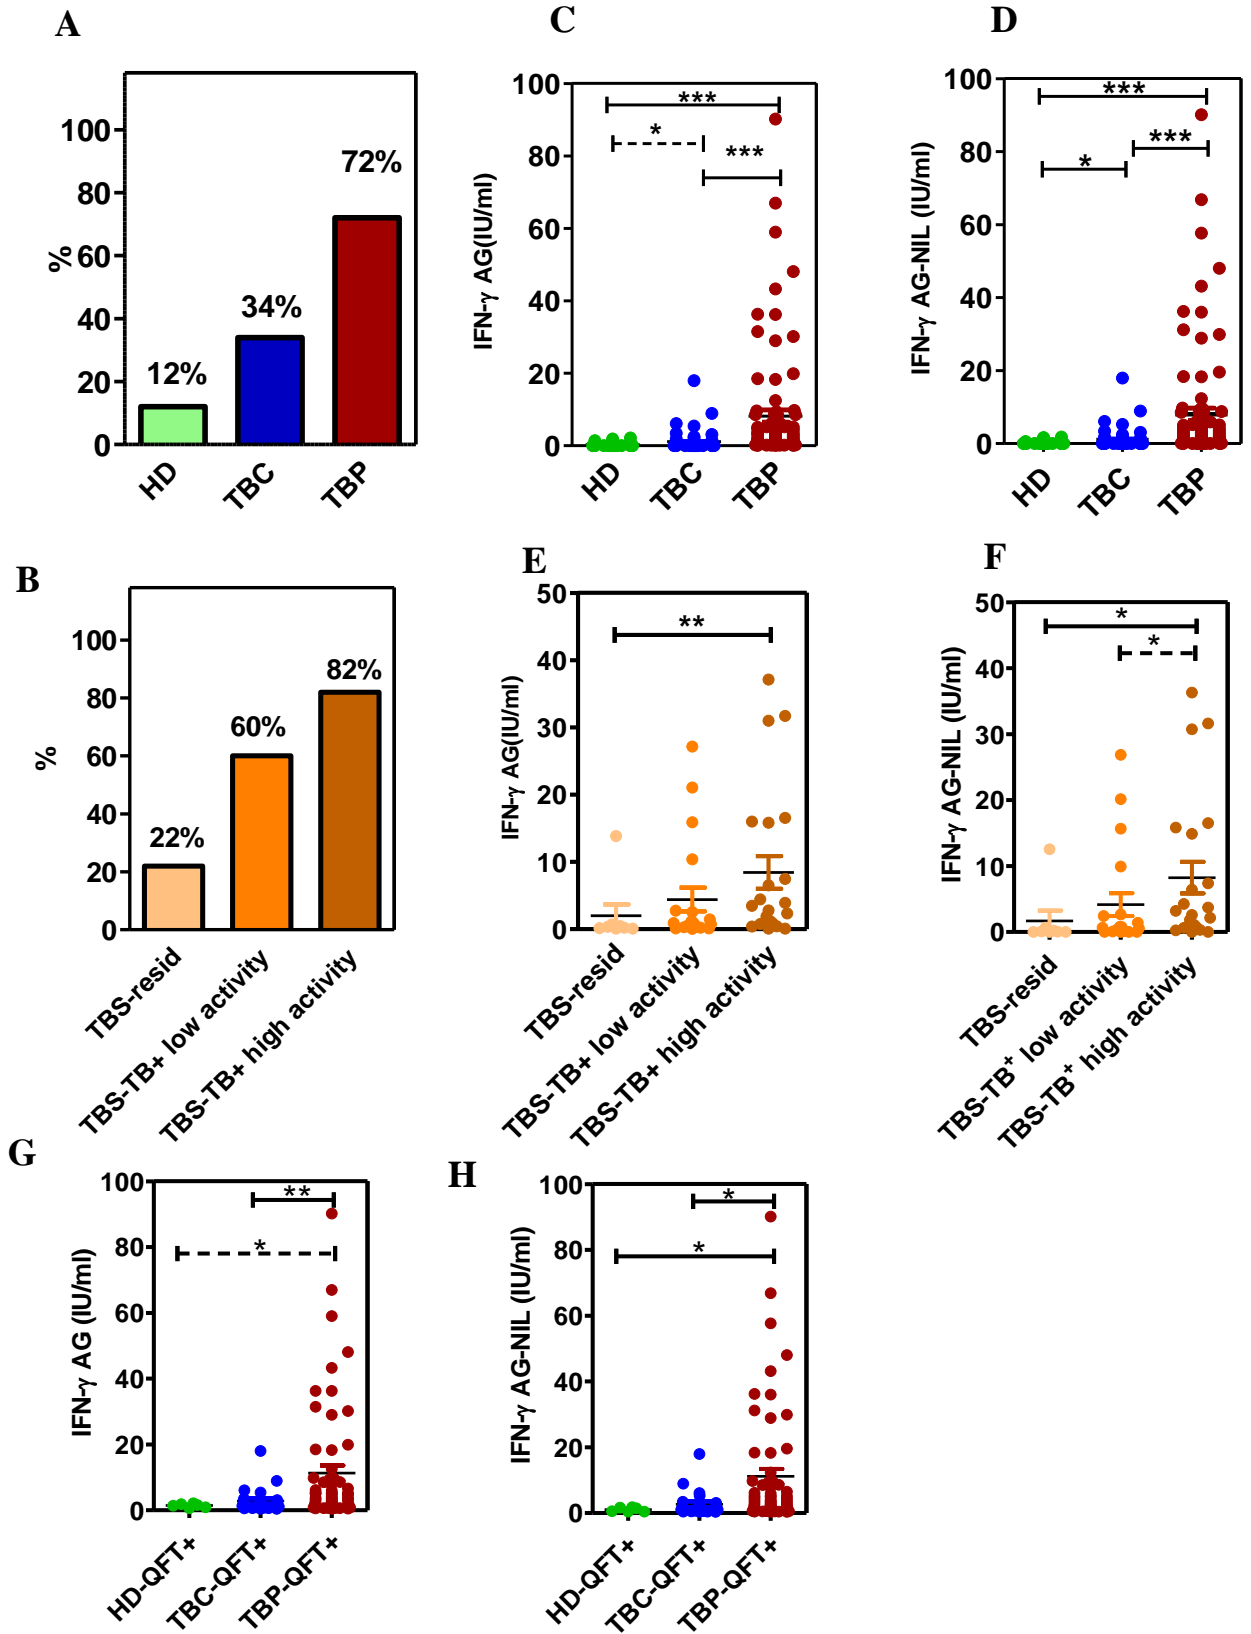

Supplement: f1 [file 7249369.f1.pdf]
